# Supplementary material for: Study on the Associations between Meteorological Factors and the Incidence of Pulmonary Tuberculosis in Xinjiang, China
Source: MDPI journal article supplement (doi:10.3390/atmos13040533), 2022-03-28
Supplement: s1 [file s1]

# Supplementary Materials: Study on the Associations between Meteorological Factors and the Incidence of Pulmonary Tuberculosis in Xinjiang, China

Chunjie Gao <sup>1</sup>, Yingdan Wang <sup>1</sup>, Zengyun Hu <sup>2,3</sup>, Haiyan Jiao <sup>1</sup> and Lei Wang <sup>4,\*</sup>

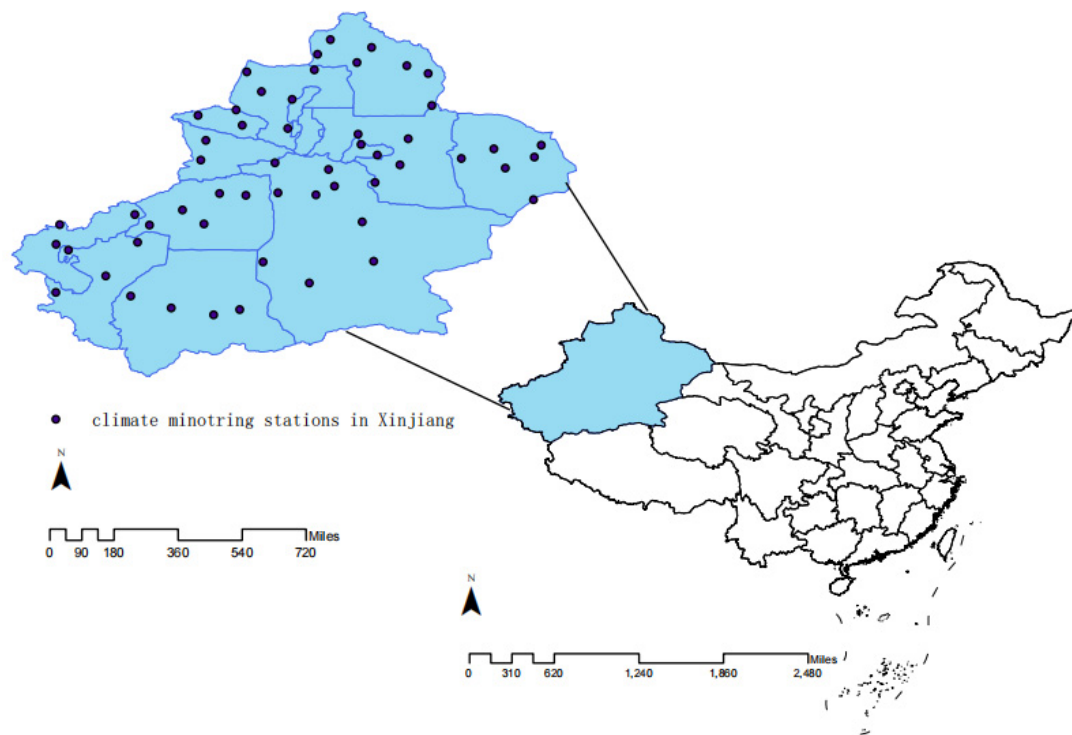

**Figure S1.** The study area and locations of weather stations.

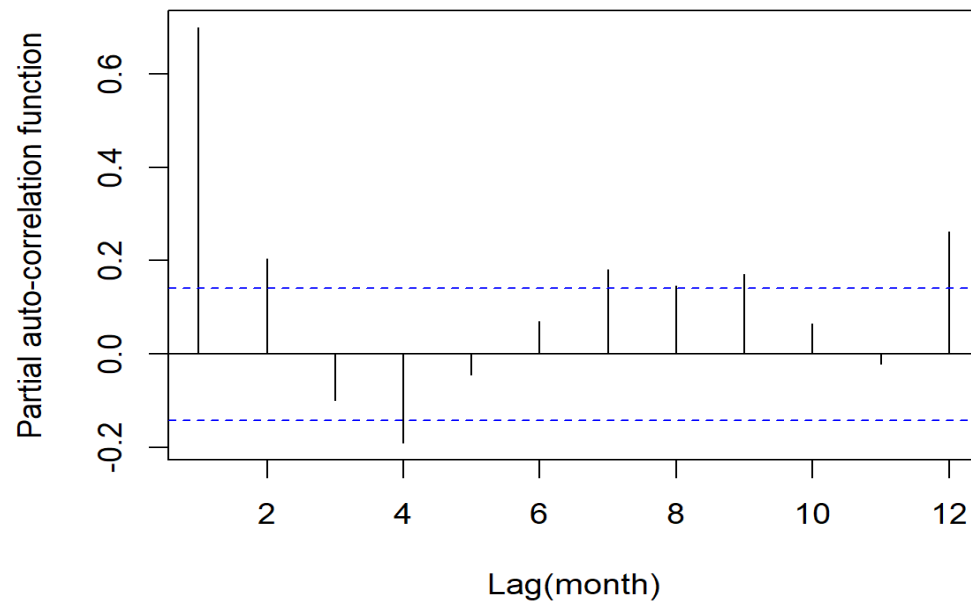

**Figure S2.** The plot of partial auto-correlation function in the distributed lag non-linear model.

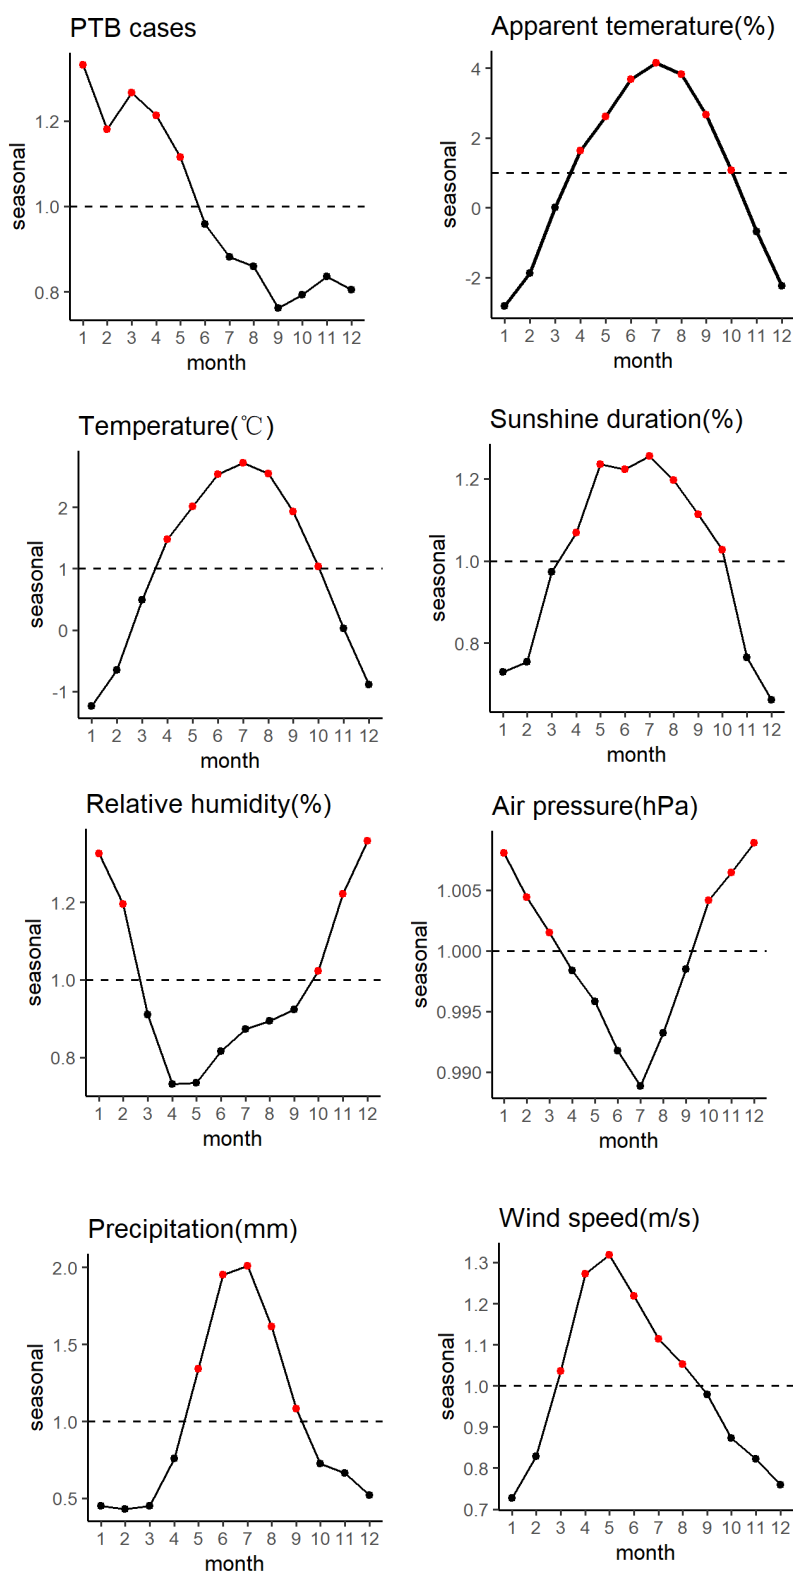

**Figure S3.** Seasonal decomposition of the time series of meteorological factors and the case incidence of PTB in Xinjiang from 2004 to 2019. Abbreviations: PTB, pulmonary tuberculosis; Temp, temperature; AT, apparent temperature; SD, sunshine duration; RH, relative humidity; AP, air pressure; Pre, precipitation; WS, wind speed.

**Table S1.** Estimated relative risks (95% CI) of pulmonary tuberculosis cases with extremely low temperature (2.5th percentile, -11.9°C) and extremely high temperature (97.5th percentile, 25°C) and extremely low relative humidity (2.5th percentile, 32.8%) and extremely high relative humidity (97.5th percentile, -68.9%) and extremely low wind speed (2.5th percentile, 1.6m/s) and extremely high wind speed (97.5th percentile, 3.1m/s) at lagged months in Xinjiang from 2004 to 2019.

| Lag   | Temp             |                   | RH               |                   | WS               |                   |
|-------|------------------|-------------------|------------------|-------------------|------------------|-------------------|
|       | P <sub>2.5</sub> | P <sub>97.5</sub> | P <sub>2.5</sub> | P <sub>97.5</sub> | P <sub>2.5</sub> | P <sub>97.5</sub> |
| lag0  | 1.59(1.53,1.66)  | 0.70(0.67,0.74)   | 1.05(1.03,1.07)  | 1.15(1.13,1.17)   | 1.10(1.08,1.12)  | 0.99(0.97,1.01)   |
| lag1  | 1.14(1.12,1.16)  | 0.87(0.84,0.90)   | 0.96(0.95,0.97)  | 1.14(1.13,1.16)   | 1.14(1.13,1.15)  | 1.02(1.00,1.03)   |
| lag2  | 0.90(0.88,0.92)  | 0.91(0.87,0.96)   | 0.91(0.90,0.93)  | 1.11(1.09,1.13)   | 1.15(1.13,1.16)  | 1.02(1.00,1.04)   |
| lag3  | 0.83(0.81,0.84)  | 0.77(0.74,0.81)   | 0.93(0.93,0.94)  | 1.04(1.03,1.05)   | 1.10(1.09,1.11)  | 1.00(0.98,1.01)   |
| lag4  | 0.81(0.79,0.83)  | 0.71(0.67,0.74)   | 0.95(0.95,0.96)  | 1.00(0.99,1.01)   | 1.06(1.05,1.07)  | 0.99(0.98,1.00)   |
| lag5  | 0.83(0.81,0.85)  | 0.72(0.68,0.75)   | 0.97(0.96,0.97)  | 0.98(0.97,0.99)   | 1.04(1.03,1.05)  | 1.00(0.98,1.01)   |
| lag6  | 0.85(0.84,0.87)  | 0.77(0.73,0.80)   | 0.98(0.97,0.98)  | 0.97(0.96,0.98)   | 1.03(1.02,1.04)  | 1.02(1.00,1.03)   |
| lag7  | 0.89(0.87,0.91)  | 0.82(0.79,0.86)   | 0.98(0.98,0.99)  | 0.97(0.96,0.98)   | 1.02(1.01,1.03)  | 1.03(1.02,1.05)   |
| lag8  | 0.92(0.90,0.94)  | 0.89(0.85,0.92)   | 0.99(0.99,1.00)  | 0.96(0.95,0.97)   | 1.01(1.00,1.02)  | 1.05(1.04,1.07)   |
| lag9  | 0.96(0.93,0.98)  | 0.95(0.92,0.99)   | 0.99(0.99,1.01)  | 0.96(0.95,0.97)   | 1.00(0.99,1.01)  | 1.07(1.06,1.09)   |
| lag10 | 0.99(0.97,1.02)  | 1.03(0.99,1.07)   | 1.01(1.00,1.02)  | 0.95(0.94,0.96)   | 0.99(0.98,0.99)  | 1.09(1.08,1.11)   |
| lag11 | 1.03(1.01,1.06)  | 1.10(1.06,1.15)   | 1.02(1.01,1.03)  | 0.95(0.94,0.96)   | 0.98(0.97,0.98)  | 1.12(1.10,1.13)   |
| lag12 | 1.07(1.04,1.10)  | 1.19(1.14,1.24)   | 1.03(1.02,1.04)  | 0.94(0.93,0.95)   | 0.97(0.96,0.97)  | 1.14(1.12,1.15)   |

Abbreviations: Temp, temperature; AT, apparent temperature; SD, sunshine duration; RH, relative humidity; AP, air pressure; Pre, precipitation; WS, wind speed.

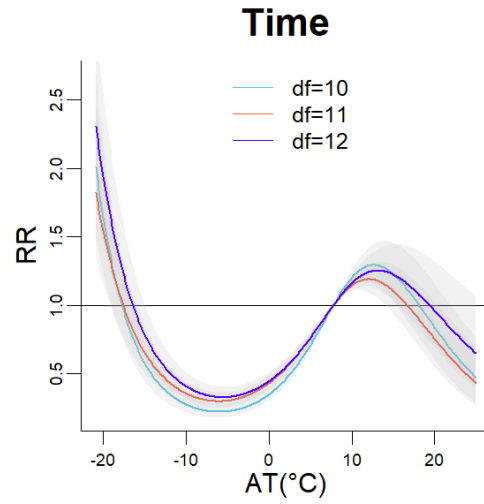

**Figure S4.** Sensitivity analysis when altering the degrees of freedom (df = 10-12) of time for controlling for the long-term trend in the model in Xinjiang from 2004 to 2019.

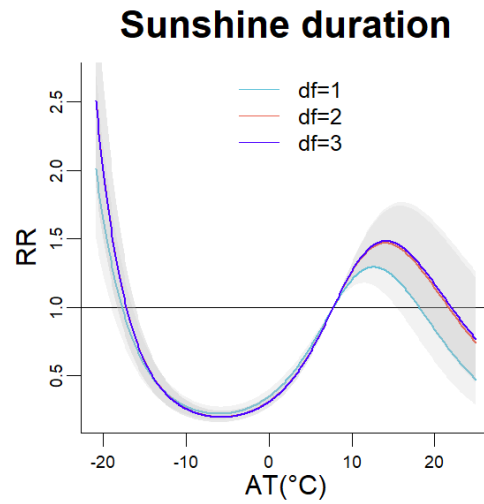

**Figure S5.** Sensitivity analysis when altering the degrees of freedom (df = 3-5) of air pressure and precipitation for controlling for the effect of confounding factors in the model in Xinjiang from 2004 to 2019.

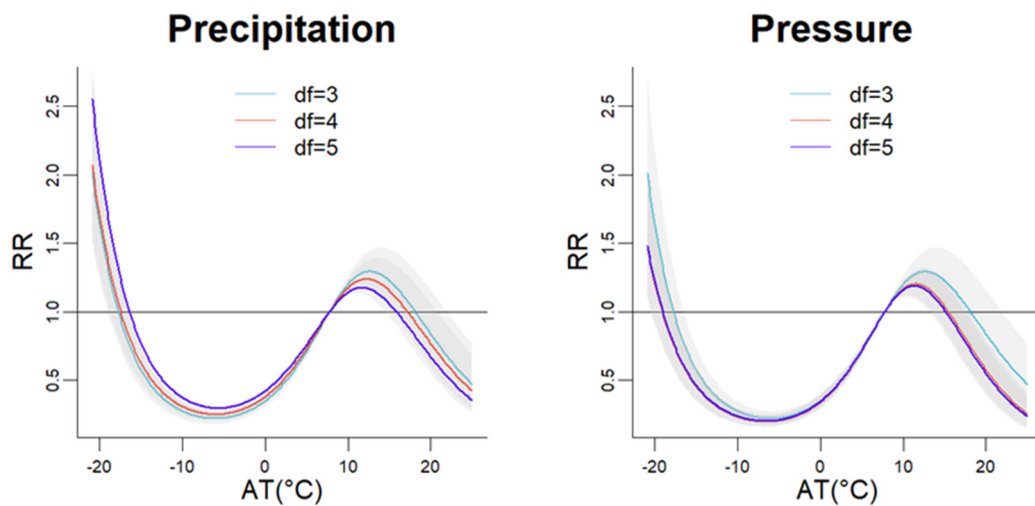

**Figure S6.** Sensitivity analysis when altering the degrees of freedom (1-3) of sunshine duration for controlling for the effect of confounding factors in the model in Xinjiang from 2004 to 2019.

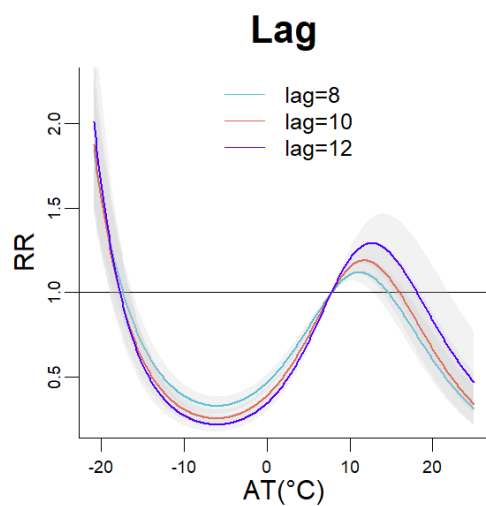

**Figure S7.** Sensitivity analysis when altering the maximum lag periods for 8, 10 and 12 months in the model in Xinjiang from 2004 to 2019.
